# Supplementary material
Source: HighWire-hosted journal article supplement (https://jnm.snmjournals.org/highwire/filestream/94766/field_highwire_adjunct_files/0/156018_Supplemental_Data.pdf)
Supplement: 156018_Supplemental_Data.pdf [file 156018_Supplemental_Data.pdf]

**SUPPLEMENTAL TABLE 1.  $^{99m}\text{Tc}$ -MIBI Parathyroid Scintigraphy Techniques**

| Technique                                                   | Tracer (activity)                                                           | Acquisition protocol                                                                                                                                                                                                                                                                                                                                                                                                                                                                     | Characteristics                                                                                                                                                        |
|-------------------------------------------------------------|-----------------------------------------------------------------------------|------------------------------------------------------------------------------------------------------------------------------------------------------------------------------------------------------------------------------------------------------------------------------------------------------------------------------------------------------------------------------------------------------------------------------------------------------------------------------------------|------------------------------------------------------------------------------------------------------------------------------------------------------------------------|
| $^{99m}\text{Tc}$ -MIBI single-tracer (dual-phase)          | $^{99m}\text{Tc}$ -MIBI (555–740 MBq)                                       | <p><math>^{99m}\text{Tc}</math>-MIBI injection and acquisition of planar images takes place at 15 min and at 120 min.</p> <p>Combination with a SPECT/CT acquisition is possible at the early or delayed phase or at both times.</p>                                                                                                                                                                                                                                                     | Simple but limited overall sensitivity because of variation in parathyroid tracer retention. Sensitivity is poor regarding detection of multiple-gland disease.        |
| $^{99m}\text{Tc}$ -MIBI/ $^{99m}\text{TcO}_4$ (subtraction) | $^{99m}\text{TcO}_4$ (75–150 MBq) and $^{99m}\text{Tc}$ -MIBI (555–740 MBq) | <p><math>^{99m}\text{TcO}_4</math> injection with thyroid imaging at 20 min is followed by <math>^{99m}\text{Tc}</math>-MIBI injection and image acquisition.</p> <p>Variants exist.</p>                                                                                                                                                                                                                                                                                                 | Requires experience for proper image realignment and optimal subtraction. Offers intermediate to high sensitivity. Patient motion can significantly decrease accuracy. |
| $^{99m}\text{Tc}$ -MIBI/ $^{123}\text{I}$ (subtraction)     | $^{123}\text{I}$ (~12 MBq) and $^{99m}\text{Tc}$ -MIBI (555–740 MBq)        | <p><math>^{123}\text{I}</math> injection (or oral administration) is followed 120 min later by <math>^{99m}\text{Tc}</math>-MIBI injection and then simultaneous acquisition of both isotopes in appropriately selected energy windows.</p> <p>An example of acquisition protocol (used in Bordeaux University Hospital) is to start with a pinhole image of the thyroid bed (10 min), then obtain a cervicomedistinal view (5 min), and finish with dual-isotope SPECT/CT (25 min).</p> | Offers high sensitivity. Experience is required for a well-balanced subtraction. There is a small additional cost due to $^{123}\text{I}$ but a gain in imaging time.  |
